# Supplementary material for: Tracking cancer lesions on surgical samples of gastric cancer by artificial intelligent algorithms
Source: PubMed Central journal article supplement (PMC8489126; doi:10.7150/jca.63879), 2021-09-03
Supplement: jcav12p6473s1.pdf [file jcav12p6473s1.pdf]

Table S1. The 10-fold cross test results of RFB-SSD

|              | mAP(%)       | Precision(%) | Recall(%)    | F1          | LAMR        |
|--------------|--------------|--------------|--------------|-------------|-------------|
| Fold1        | 86.17        | 89.58        | 87.76        | 0.89        | 0.21        |
| Fold2        | 89.84        | 88.00        | 89.80        | 0.89        | 0.16        |
| Fold3        | 92.31        | 91.84        | 91.84        | 0.92        | 0.12        |
| <b>Fold4</b> | <b>95.90</b> | <b>92.16</b> | <b>95.92</b> | <b>0.94</b> | <b>0.07</b> |
| Fold5        | 87.67        | 85.42        | 83.67        | 0.85        | 0.20        |
| Fold6        | 87.14        | 84.31        | 87.76        | 0.86        | 0.19        |
| Fold7        | 91.32        | 86.00        | 87.76        | 0.87        | 0.14        |
| Fold8        | 90.13        | 89.58        | 87.76        | 0.89        | 0.15        |
| Fold9        | 93.08        | 91.49        | 87.76        | 0.90        | 0.13        |
| Fold10       | 85.36        | 83.67        | 83.67        | 0.84        | 0.25        |
| Mean         | 89.89        | 88.21        | 88.37        | 0.89        | 0.16        |
| Lower 95% CI | 87.49        | 85.92        | 85.79        | 0.86        | 0.12        |
| Upper 95% CI | 92.29        | 90.49        | 90.95        | 0.91        | 0.20        |

Table S2. The 10-fold cross test results of ResNet50-PSPNet

|               | GC IoU       | Background IoU | mIoU         |
|---------------|--------------|----------------|--------------|
| Fold1         | 62.44        | 96.21          | 79.32        |
| Fold2         | 63.24        | 96.19          | 79.72        |
| Fold3         | 58.81        | 95.51          | 77.16        |
| Fold4         | 63.37        | 96.4           | 79.89        |
| Fold5         | 63.5         | 96.21          | 79.85        |
| Fold6         | 60.06        | 95.98          | 78.02        |
| Fold7         | 59.33        | 95.74          | 77.54        |
| Fold8         | 62.58        | 96.37          | 79.48        |
| Fold9         | 64.89        | 96.45          | 80.67        |
| <b>Fold10</b> | <b>65.38</b> | <b>96.56</b>   | <b>80.97</b> |
| Mean          | 62.36        | 96.16          | 79.26        |
| Lower 95% CI  | 60.75        | 95.93          | 78.34        |
| Upper 95% CI  | 63.97        | 96.40          | 80.18        |

Table S3. The clinical information of gastric cancer used in this study

| Characteristics                 | Testing dataset      | Prospective validation dataset |
|---------------------------------|----------------------|--------------------------------|
| Male/female, No. (%)            | 23/11(67.65%/32.35%) | 40/8(83.33%/16.67%)            |
| Age, median, (range), years     | 62.56(11.87)         | 67.31(10.01)                   |
| Tumor size, median, (range), mm | 3.87(2.58)           | 3.57(1.93)                     |
| Tumor location, No. (%)         |                      |                                |
| Cardia                          | 3(8.82%)             | 5(10.42%)                      |
| Body                            | 12(35.29%)           | 19(39.58%)                     |
| Pylorus                         | 17(50.00%)           | 23(47.92%)                     |
| Whole stomach                   | 2(5.88%)             | 1(2.08%)                       |
| Macroscopic types, No. (%)      |                      |                                |
| Borrmann 0                      | 6(17.64%)            | 12(25.00%)                     |
| Borrmann I                      | 0(0.00%)             | 3(6.25%)                       |
| Borrmann II                     | 2(5.88%)             | 8(16.67%)                      |
| Borrmann III                    | 23(67.65%)           | 22(45.83%)                     |
| Borrmann IV                     | 3(8.82%)             | 3(6.25%)                       |
| Depth of invasion, No. (%)      |                      |                                |
| Mucosa and submucosa            | 6(17.65%)            | 12(25.00%)                     |
| Muscularis propria              | 6(17.65%)            | 5(10.42%)                      |
| Subserosa                       | 13(38.24%)           | 17(35.42%)                     |
| Serosa                          | 5(14.71%)            | 10(20.83%)                     |
| Perforating serosa              | 4(11.76%)            | 4(8.33%)                       |
| Stage, No. (%)                  |                      |                                |
| Early gastric cancer            | 6(17.68%)            | 12(25.00%)                     |
| Advanced gastric cancer         | 28(82.35%)           | 36(75.00%)                     |
| Lymph node metastasis, No. (%)  |                      |                                |
| Metastasis                      | 16(47.06%)           | 21(43.75%)                     |
| No metastasis                   | 18(52.94%)           | 27(56.25%)                     |
